# Supplementary material for: Limitation of Ni-rich layered cathodes in all-solid-state lithium batteries
Source: Royal Society of Chemistry journal article supplement (doi:10.1039/d3ta05060b), 2023-01-01
Supplement: d3ta05060b1.pdf [file d3ta05060b1.pdf]

## Supplementary information

### **Limitation of Ni-rich layered cathode in all-solid-state lithium batteries**

Tae-Yeon Yu,<sup>a</sup> Han-Uk Lee,<sup>a</sup> Jin Wook Lee,<sup>a</sup> Sung-Min Park,<sup>a</sup> In-Su Lee,<sup>a</sup> Hun-Gi Jung,<sup>b</sup> and Yang-Kook Sun<sup>\*,a,c</sup>

<sup>a</sup> Department of Energy Engineering, Hanyang University, Seoul 04763, Republic of Korea

<sup>b</sup> Center for Energy Storage Research, Korea Institute of Science and Technology (KIST), Seoul 02792, Republic of Korea

<sup>c</sup> Department of Battery Engineering, Hanyang University, Seoul 04763, Republic of Korea

\*Corresponding author: [yksun@hanyang.ac.kr](mailto:yksun@hanyang.ac.kr)

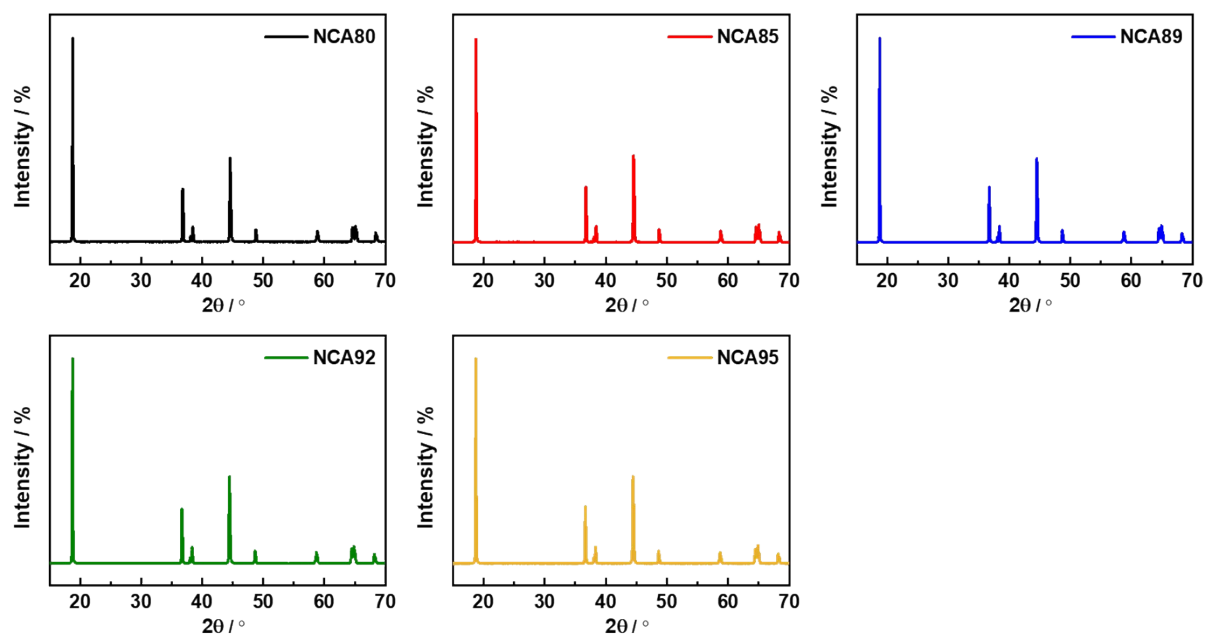

**Fig. S1** XRD patterns of the NCA80, NCA85, NCA89, NCA92, and NCA95 cathodes.

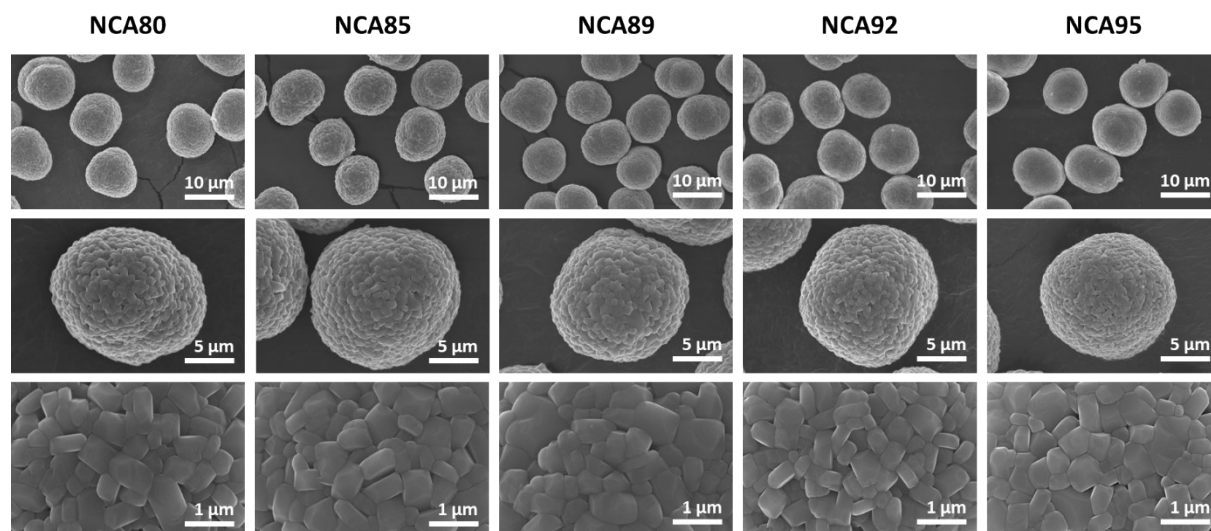

**Fig. S2** Powder SEM images of the NCA80, NCA85, NCA89, NCA92, and NCA95 cathodes.

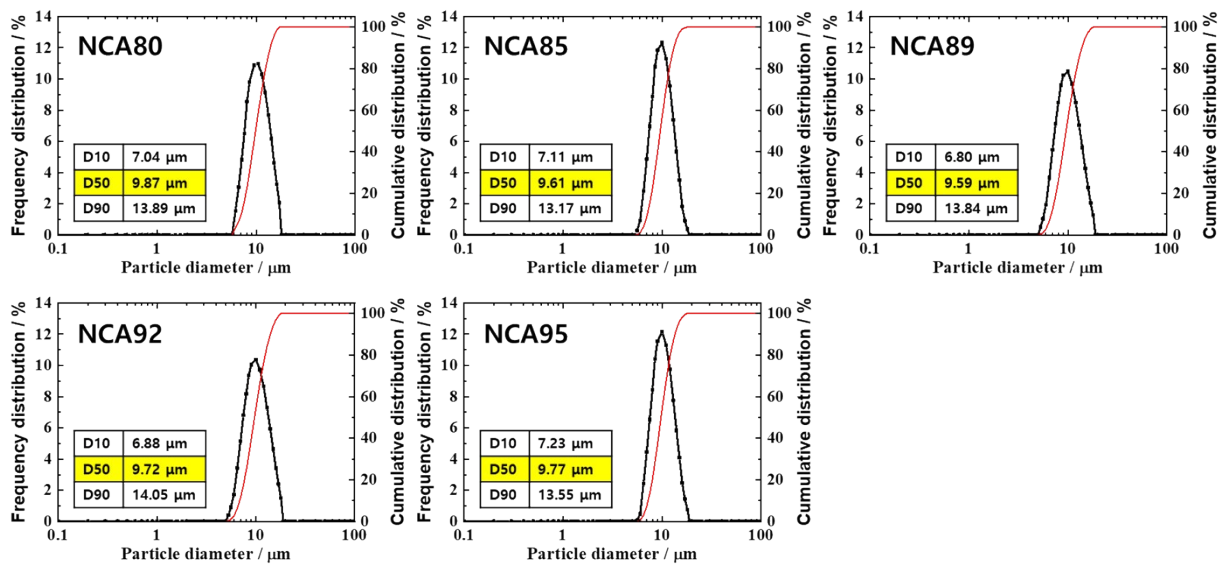

**Fig. S3** Particle size analysis of the NCA80, NCA85, NCA89, NCA92, and NCA95 cathodes.

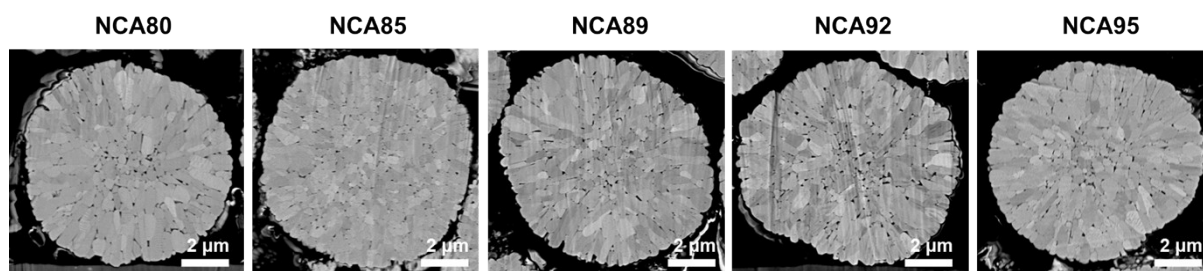

**Fig. S4** Cross-sectional SEM images of as-synthesized NCA80, NCA85, NCA89, NCA92, and NCA95 cathodes.

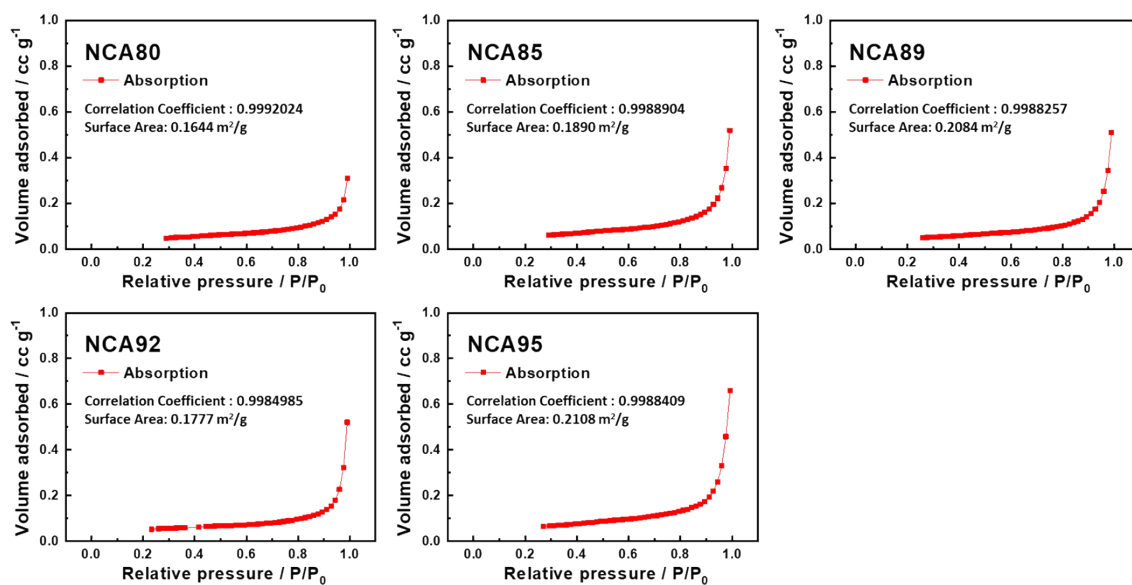

**Fig. S5** The specific surface areas of the NCA80, NCA85, NCA89, NCA92, and NCA95 cathodes, as determined by BET analysis.

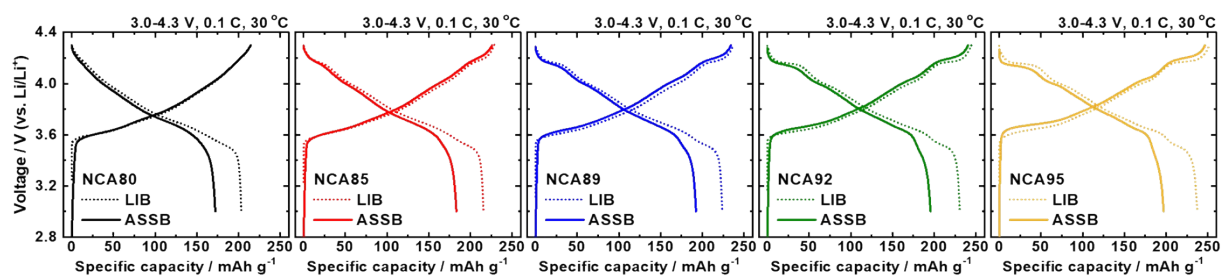

**Fig. S6** The initial charge-discharge profiles of the NCA cathodes in LIB and ASSB at a current density of 0.1 C between 3.0-4.3 V.

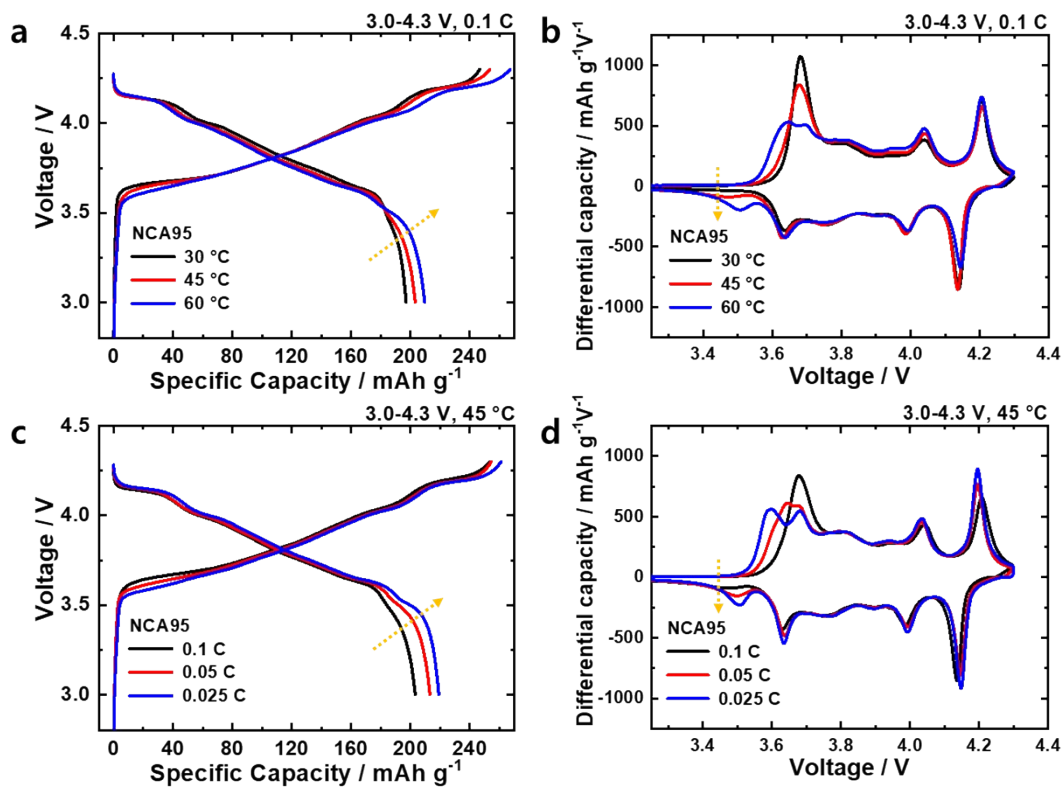

**Fig. S7** The initial charge-discharge profiles and corresponding differential capacity ( $dQ/dV^{-1}$ ) curves of the NCA95 cathode measured (a,b) at various temperature with a current density of 0.1 C and (c,d) with various current densities at 45 °C between 3.0-4.3 V.



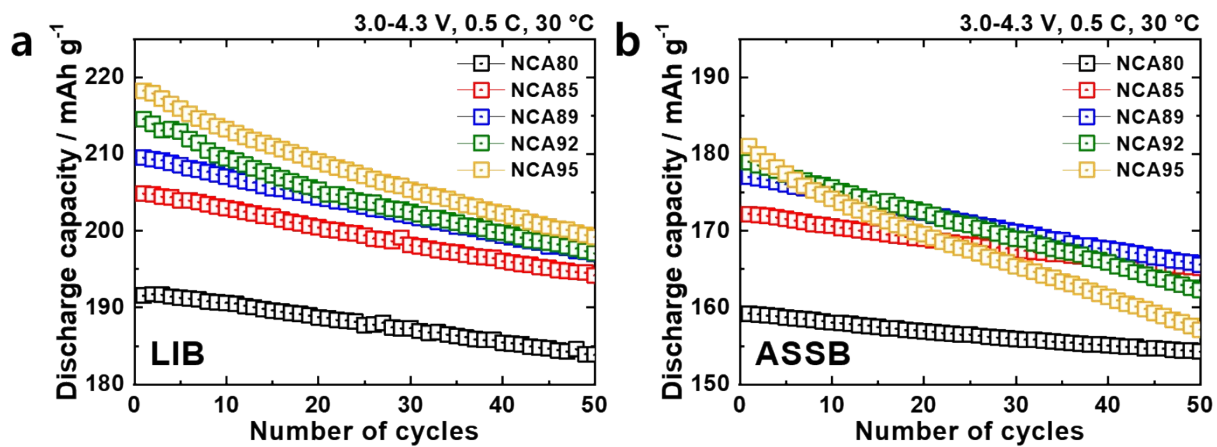

**Fig. S8** Cycling performance of the NCA cathodes in (a) LIB and (b) ASSB

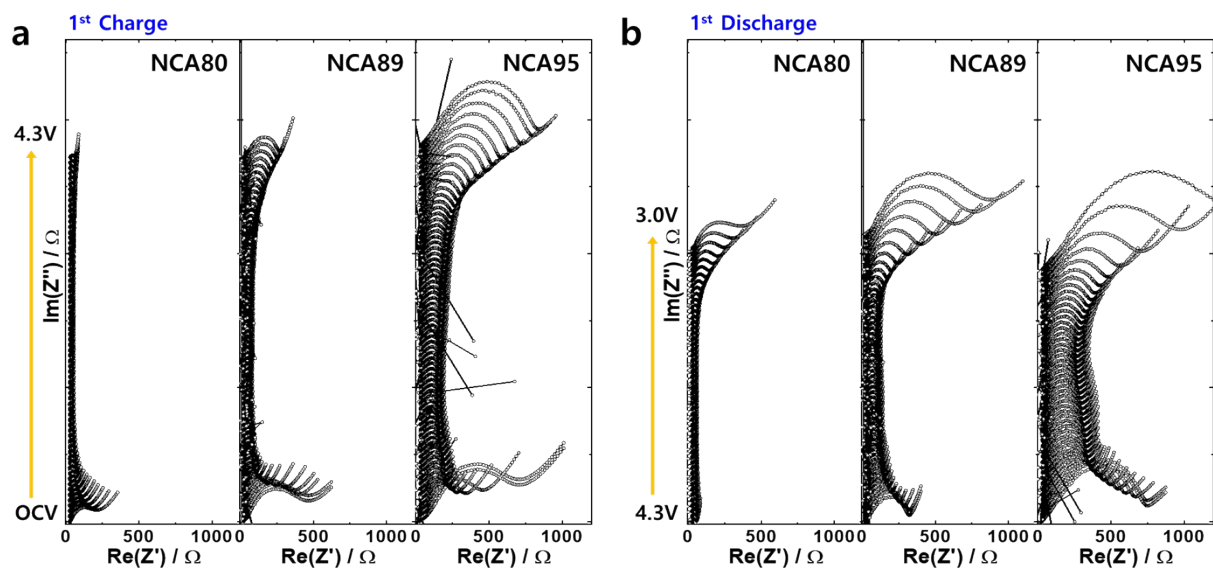

**Fig. S9** Nyquist plots of the NCA80, NCA89, and NCA95 cathodes in ASSB during the initial charge/discharge process.

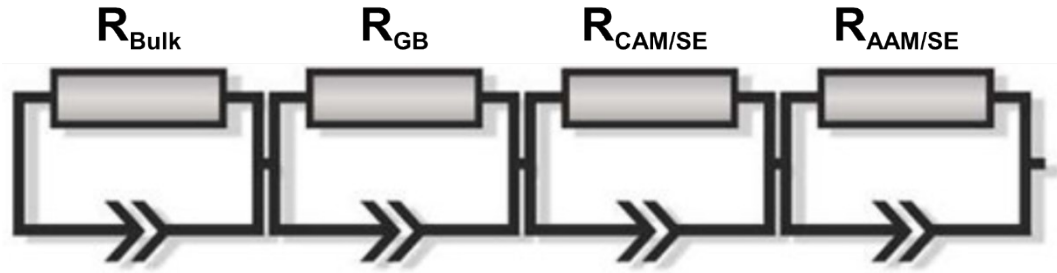

**Fig. S10** An equivalent circuit is used to fit the experimental data.

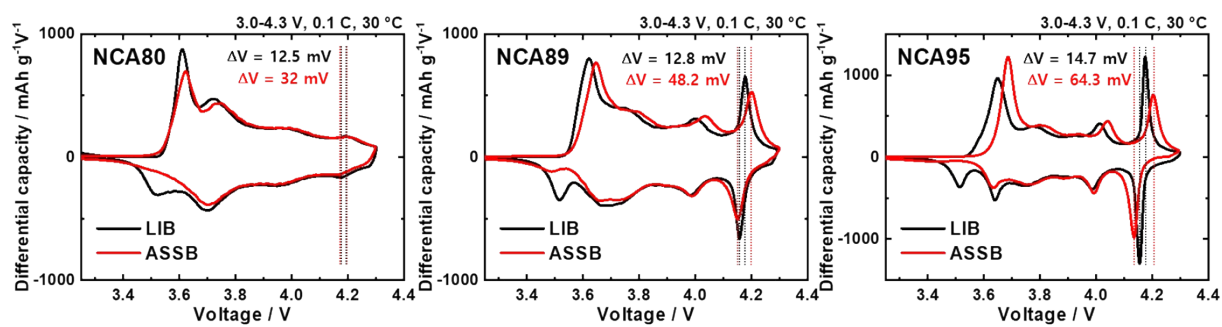

**Fig. S11** Differential capacity ( $dQ \text{ dV}^{-1}$ ) curves of the NCA80, NCA89, and NCA95 cathodes for comparison between LIB and ASSB.

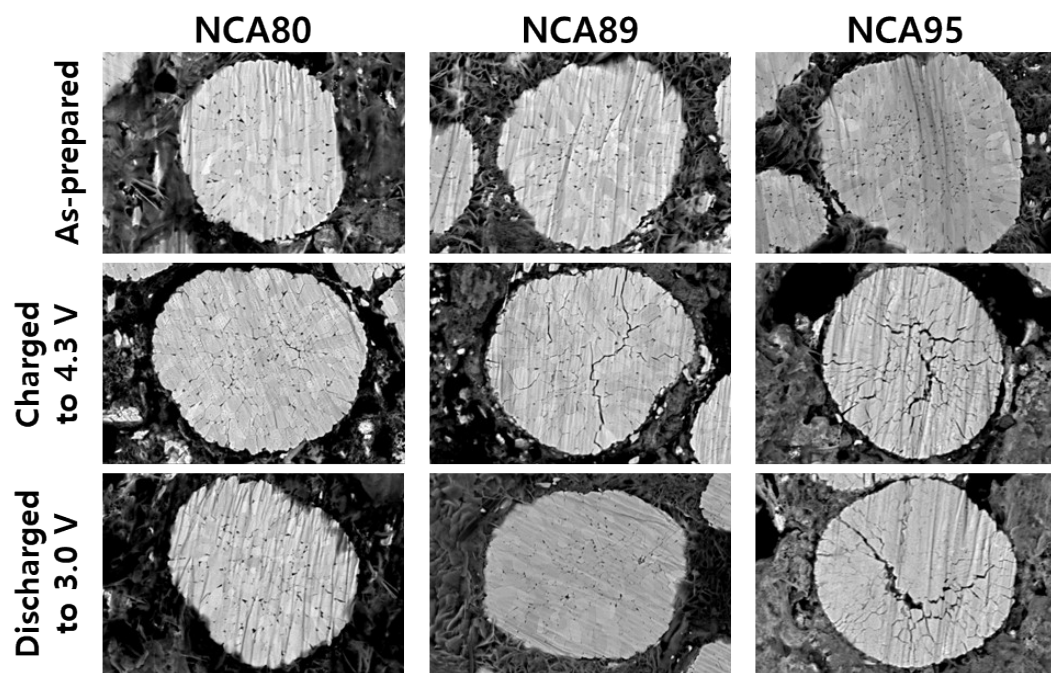

**Fig. S12** Cross-sectional SEM images of the NCA80, NCA89, and NCA95 cathodes before and during the initial cycle.

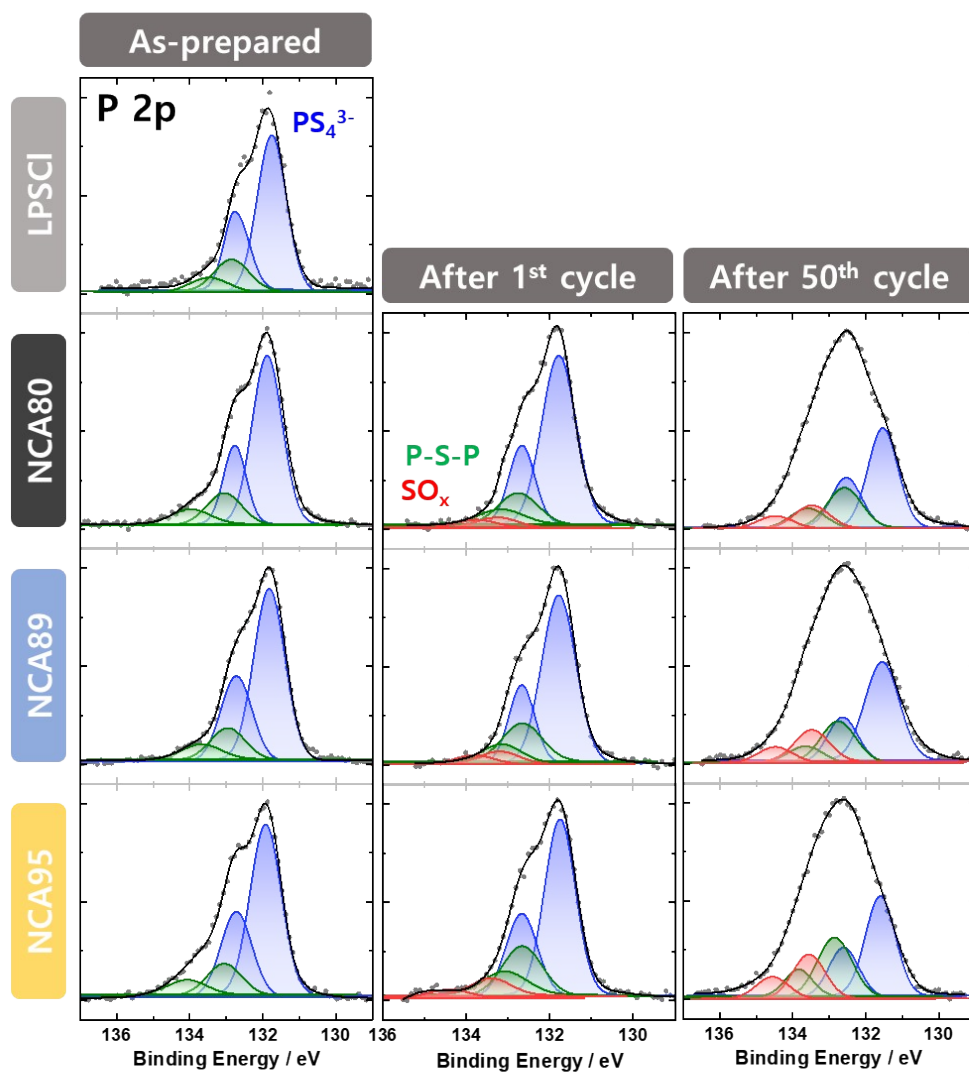

**Fig. S13** Ex-situ P 2p XPS spectra of the pristine LPSCI solid electrolyte and cathodes before cycling, after the initial cycle and after 50 cycles.

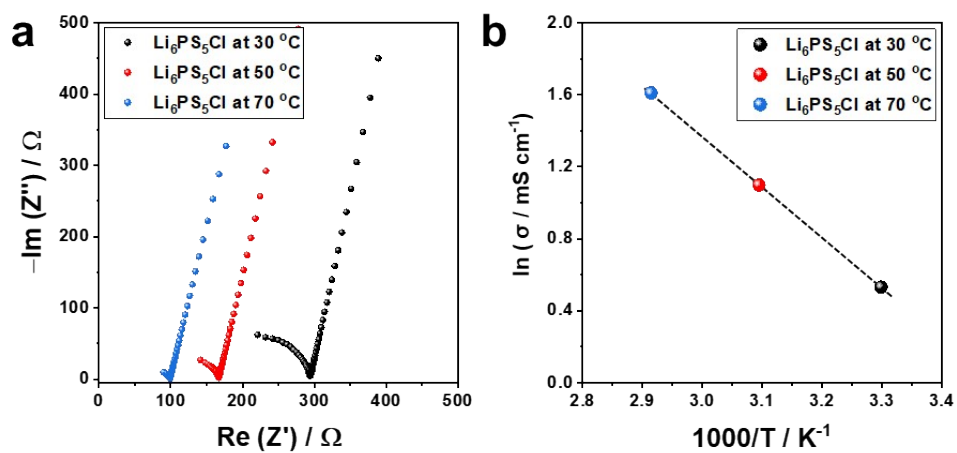

**Fig. S14** (a) Nyquist plots and (b) Arrhenius plots of LPSCl powders at a temperature range of 30-70 °C.

**Table S1.** ICP-OES results of the as-prepared cathode materials

| Metal stoichiometry determined by ICP-OES (at. %) |                                                                           |       |       |      |
|---------------------------------------------------|---------------------------------------------------------------------------|-------|-------|------|
| Sample                                            | Target composition                                                        | Ni    | Co    | Al   |
| NCA80                                             | [Ni <sub>0.80</sub> Co <sub>0.17</sub> Al <sub>0.03</sub> ]O <sub>2</sub> | 80.62 | 17.03 | 2.35 |
| NCA85                                             | [Ni <sub>0.85</sub> Co <sub>0.13</sub> Al <sub>0.02</sub> ]O <sub>2</sub> | 84.99 | 13.47 | 1.54 |
| NCA89                                             | [Ni <sub>0.89</sub> Co <sub>0.10</sub> Al <sub>0.01</sub> ]O <sub>2</sub> | 89.17 | 10.03 | 0.80 |
| NCA92                                             | [Ni <sub>0.92</sub> Co <sub>0.07</sub> Al <sub>0.01</sub> ]O <sub>2</sub> | 92.05 | 7.14  | 0.81 |
| NCA95                                             | [Ni <sub>0.95</sub> Co <sub>0.04</sub> Al <sub>0.01</sub> ]O <sub>2</sub> | 95.37 | 3.80  | 0.83 |



**Table S2.** Results of the refinement of the XRD data.

| Sample | Lattice parameters |                    |                          |                   |
|--------|--------------------|--------------------|--------------------------|-------------------|
|        | <i>a</i> -axis [Å] | <i>c</i> -axis [Å] | Volume [Å <sup>3</sup> ] | Cation mixing [%] |
| NCA80  | 2.8624             | 14.1755            | 100.587                  | 0.3               |
| NCA85  | 2.8667             | 14.1825            | 100.938                  | 0.4               |
| NCA89  | 2.8689             | 14.1851            | 101.110                  | 0.7               |
| NCA92  | 2.8708             | 14.1903            | 101.282                  | 0.8               |
| NCA95  | 2.8719             | 14.1956            | 101.395                  | 1.2               |
